# Supplementary material for: A new “zero-strain” material for electrochemical lithium insertion
Source: Royal Society of Chemistry journal article supplement (doi:10.1039/c3ta10878c), 2013-01-01
Supplement: c3ta10878c.pdf [file c3ta10878c.pdf]

Supplementary Information

## A new "zero-strain" material for electrochemical lithium insertion

Yunpeng Gu,<sup>a</sup> Kouji Taniguchi,\*<sup>b</sup> Ryosuke Tajima,<sup>a</sup> Shin-ichi Nishimura,<sup>c</sup> Daisuke Hashizume,<sup>d</sup> Atsuo Yamada<sup>c</sup> and Hidenori Takagi<sup>b,d</sup>

<sup>a</sup> Department of Advanced Materials Science, The University of Tokyo, Kashiwa 277-8561, Japan.

<sup>b</sup> Department of Physics, The University of Tokyo, Tokyo 113-0033, Japan. Fax:

+81-3-5841-4619; Tel: +81-3-5841-4619; E-mail: taniguchi@phys.s.u-tokyo.ac.jp

<sup>c</sup> Department of Chemical System Engineering, The University of Tokyo, Tokyo 113-8656, Japan.

<sup>d</sup> Advanced Science Institute, RIKEN, Wako 351-0198, Japan.

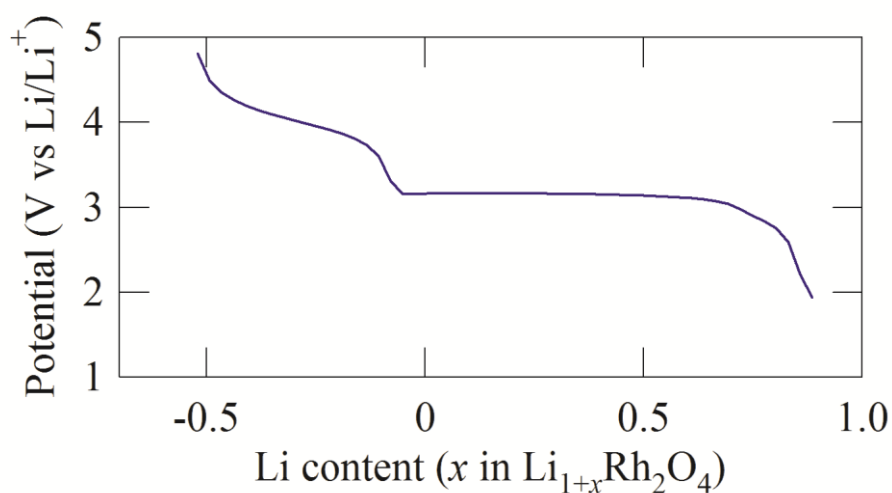

Figure S1. Electrochemical Li extraction and insertion for LiRh<sub>2</sub>O<sub>4</sub>. The cell voltage was initially charged to 4.8 V (vs Li/Li<sup>+</sup>), and then the discharge test was performed between 4.8 V and 2.0 V at a constant current density of 10 mA g<sup>-1</sup>.
